# Supplementary material for: Leveraging the Expertise of the New Jersey Mosquito Control Community to Jump Start Standardized Tick Surveillance
Source: Insects. 2019 Jul 24;10(8):219. doi: 10.3390/insects10080219 (PMC6723063; doi:10.3390/insects10080219)
Supplement: Supplementary file 1 [file insects-10-00219-s001.xlsx]

## Sheet: By County
		I. scapularis				A. americanum				D. variabilis			H. longicornis			H. leporispalustris
County	Males	Females	Nymphs	IS TOTAL	Males	Females	Nymphs	AA TOTAL	Males	Females	DV TOTAL	Nymph	Larvae	HL TOTAL	Nymph	Larvae	HLP TOTAL
Atlantic		1	2	3	9	1	15	25	2	1	3			0			0
Bergen				0				0	18	17	35			0			0
Burlington				0	8	4	27	39	3	3	6			0			0
Camden				0	4	3	10	17	2	3	5			0		1	1
Cape May				0	2		1	3	2	3	5			0			0
Cumberland			1	1	3	2	25	30	1	3	4			0			0
Essex				0				0	15	12	27			0			0
Gloucester				0	9	10	25	44	3	5	8			0			0
Hudson				0				0	42	46	88			0			0
Hunterdon	4	2	7	13				0	6	4	10	1	4	5			0
Mercer				0				0	8	5	13	2		2			0
Middlesex		7	2	9	4	1	6	11	5	8	13	19	7	26			0
Monmouth				0	1			1	44	43	87			0			0
Morris				0				0	13	14	27			0			0
Ocean		1		1	9	10	46	65	16	16	32			0	1		1
Passaic	4			4				0	7	6	13			0			0
Salem				0		1	1	2	9	4	13			0			0
Somerset				0		1		1	23	32	55			0			0
Sussex	1			1				0	1	2	3			0			0
Union	1	1		2				0	18	11	29	3		3			0
Warren	1	2		3				0	13	9	22			0			0
Grand Total	11	14	12	37	49	33	156	238	251	247	498	25	11	36	1	1	2
